# Supplementary material for: The Telomere Capping Complex CST Has an Unusual Stoichiometry, Makes Multipartite Interaction with G-Tails, and Unfolds Higher-Order G-Tail Structures
Source: PubMed Central journal article supplement (PMC3536697; doi:10.1371/journal.pgen.1003145), 2013-01-03

# Figure S2

**A**

|                 |                                         |
|-----------------|-----------------------------------------|
| <i>Cg</i> TELX1 | TGTGGGGTCTGGGTG                         |
| <i>C</i> /TELX2 | (TCTTTAGGGAGGTACTGATGT) <sub>2</sub>    |
| <i>Le</i> TELX2 | (CGGTGTAAGGATGCACTTGAAACT) <sub>2</sub> |
| R1              | TTAGGATCCATGAAACTGAAGAAGGTAAACTGGTA     |

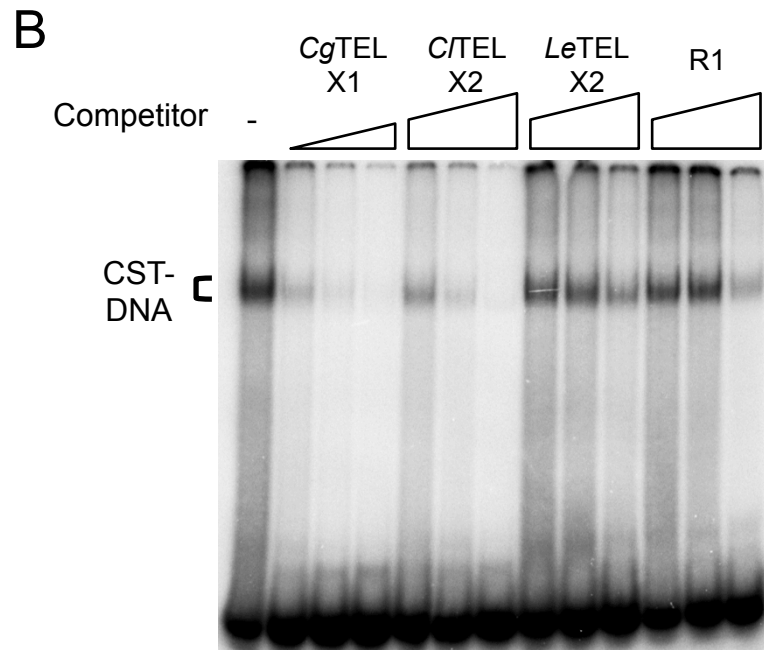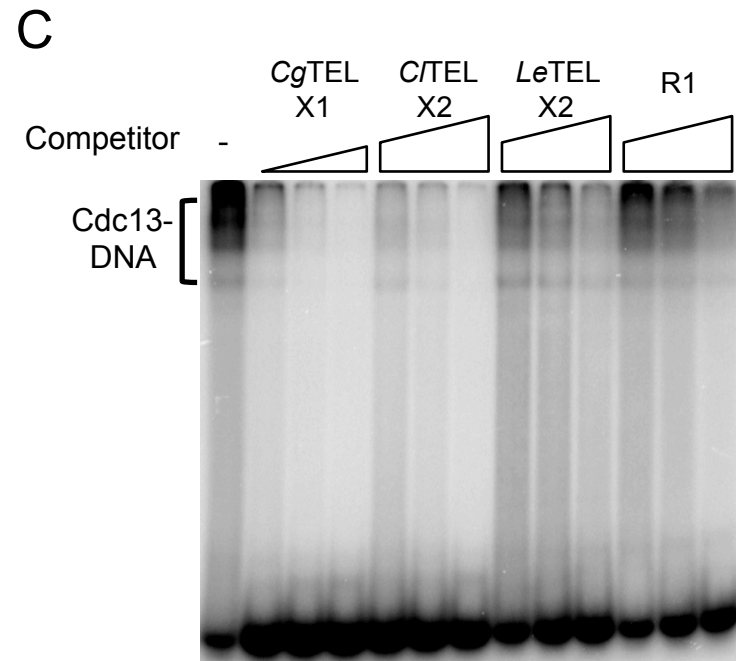

Supplement: pgen.1003145.s002.pdf [file pgen.1003145.s002.pdf]
