# Supplementary material for: The Telomere Capping Complex CST Has an Unusual Stoichiometry, Makes Multipartite Interaction with G-Tails, and Unfolds Higher-Order G-Tail Structures
Source: PubMed Central journal article supplement (PMC3536697; doi:10.1371/journal.pgen.1003145), 2013-01-03

# Figure S6

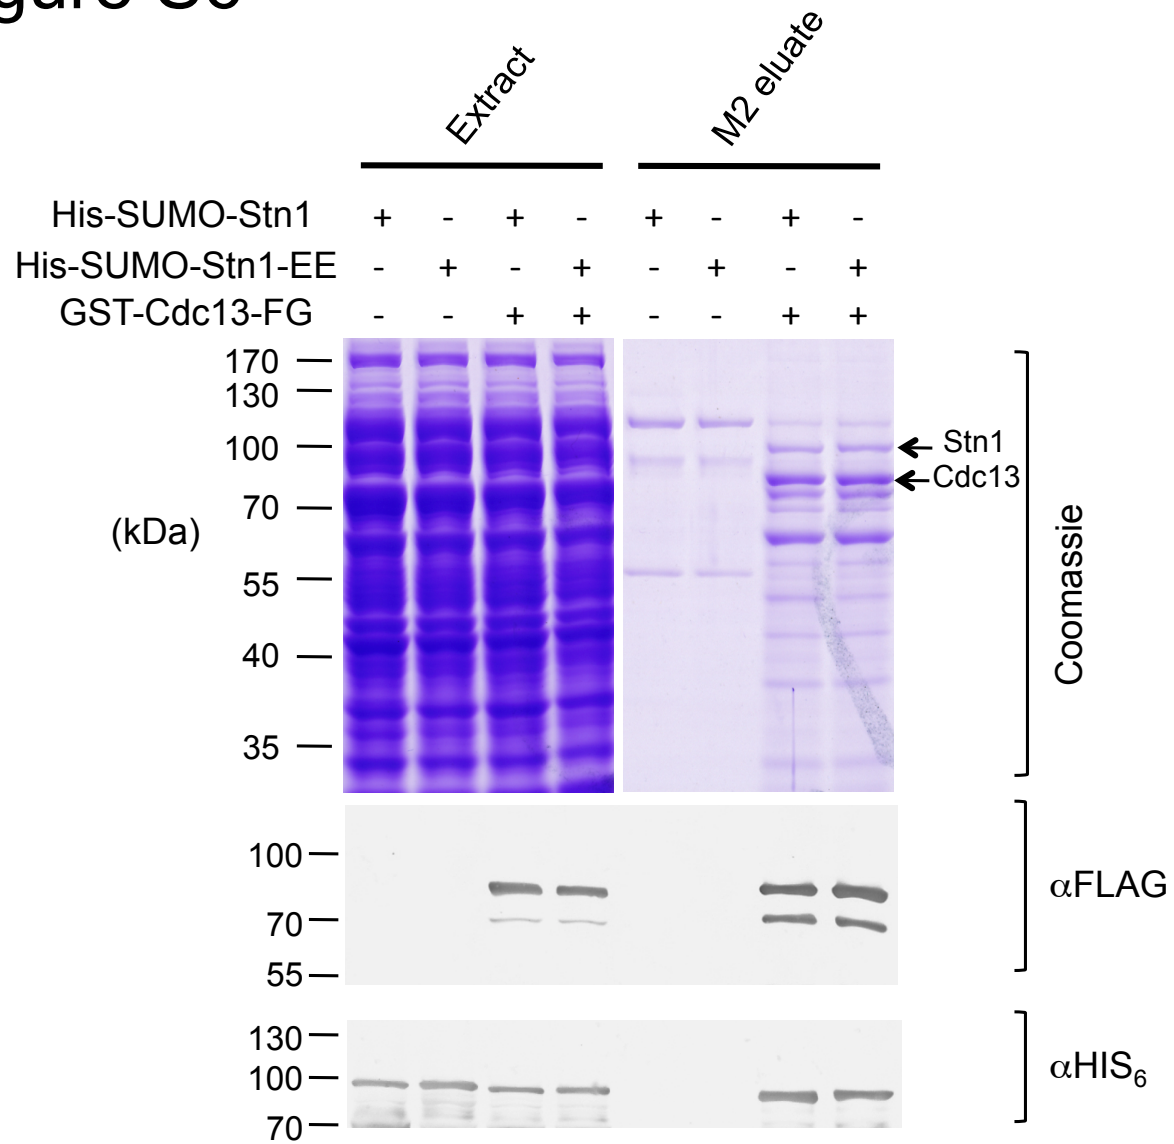

Supplement: pgen.1003145.s006.pdf [file pgen.1003145.s006.pdf]
